# Supplementary material for: A mechanism of the luminescent covalent organic framework for the detection of NH3
Source: Royal Society of Chemistry journal article supplement (doi:10.1039/c9nj00243j), 2019-01-01
Supplement: c9nj00243j1.pdf [file c9nj00243j1.pdf]

## Supporting Information For

### A mechanism of luminescent covalent organic framework for the detection of NH<sub>3</sub>

Yanan Yang, Zhengyan Zhao, Yang Yan, Guanglan Li, Ce Hao\*

State Key Laboratory of Fine Chemicals, School of Petroleum and Chemical Engineering, Dalian  
University of Technology, Panjin campus, 124221, China.

E-mail: haoce@dlut.edu.cn;

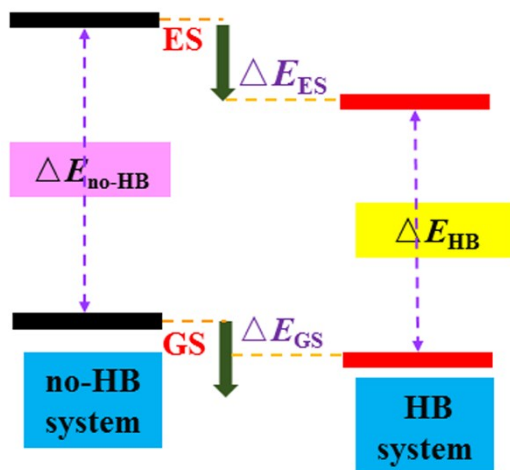

**Fig. S1.** Schematic diagram of hydrogen bond strengthening in the excited state.<sup>1</sup>

#### References:

1. G. Zhao and K. Han, Ultrafast hydrogen bond strengthening of the photoexcited fluorenone in alcohols for facilitating the fluorescence quenching. *J. Phys. Chem. A*, 2007, **111**, 9218.
